# Supplementary material
Source: publisher figshare collection journal article supplement (https://karger.figshare.com/ndownloader/files/31530626)
Supplement: Supplementary file 1 [file 31530626]

# Supplementary material

**Value of cardiopulmonary exercise testing in the prognosis assessment of COPD patients** **– a retrospective, multicentre cohort study**

Ralf Ewert, Anne Obst, Andreas Mühle, Michael Halank, Jörg Winkler, Bernd Trümper, Gerhard Hoheisel, Andreas Hoheisel, Mark Wiersbitzky, Alexander Heine, Alexander Maiwald, Sven Gläser, Beate Stubbe

# Supplementary figures


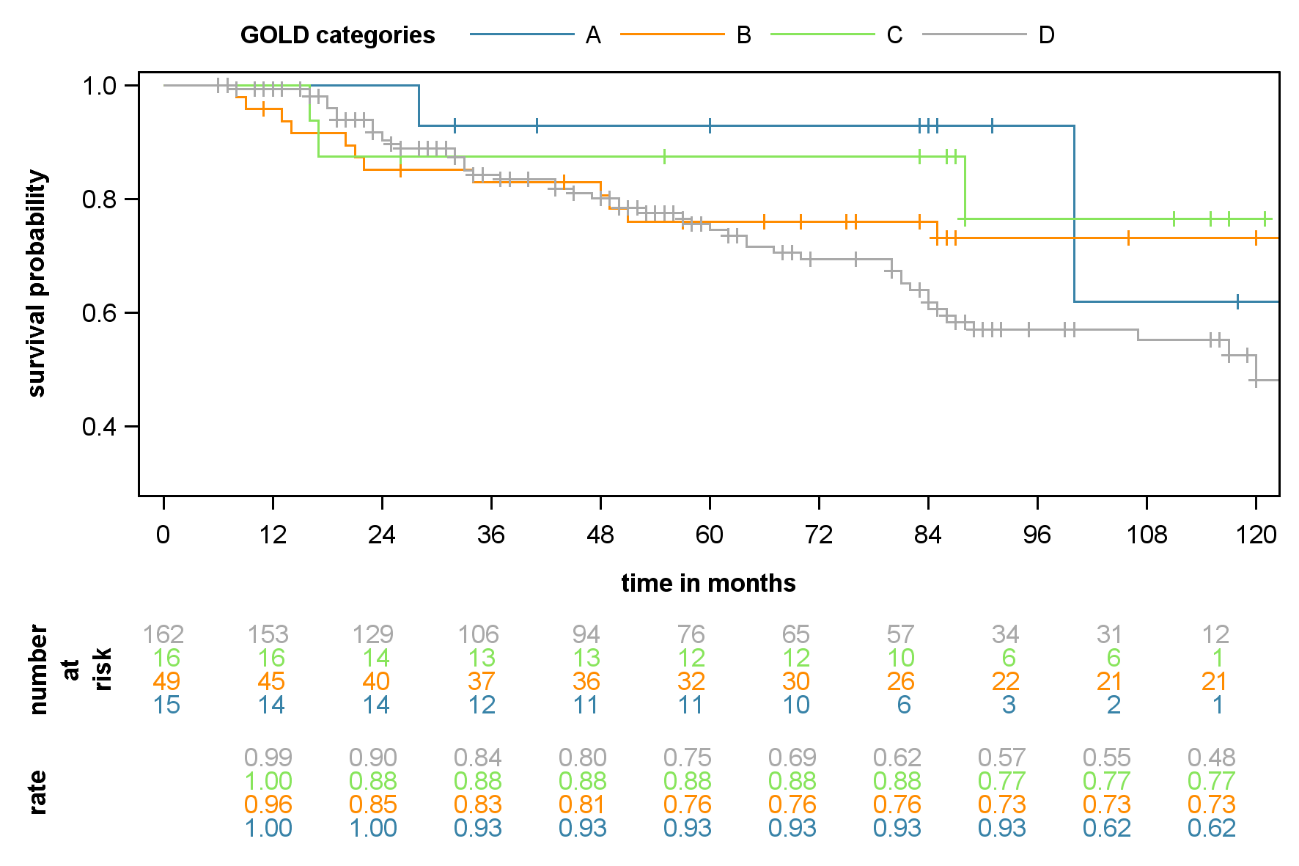


***Figure S1*: All-cause mortality according to GOLD categories**

GOLD=Global Initiative for Chronic Obstructive Lung Disease.


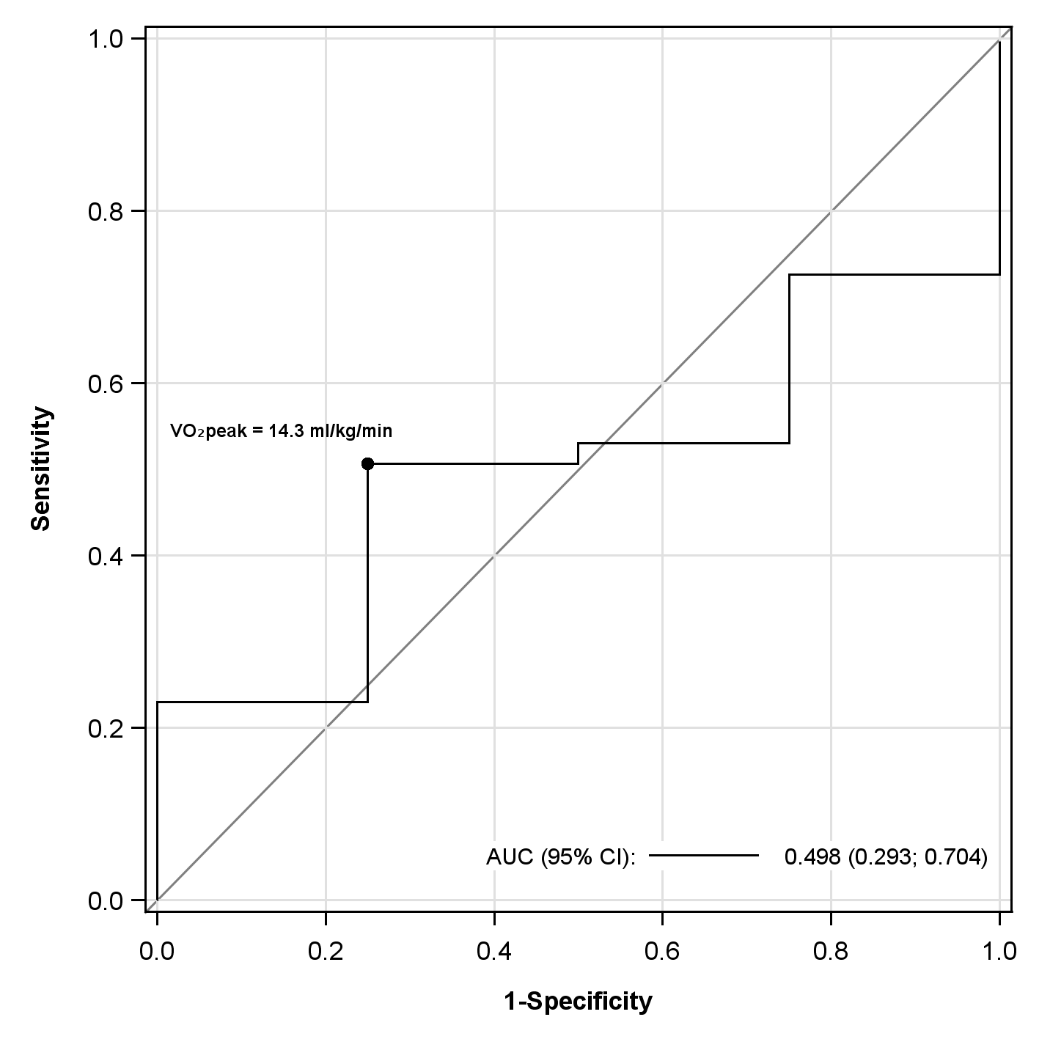


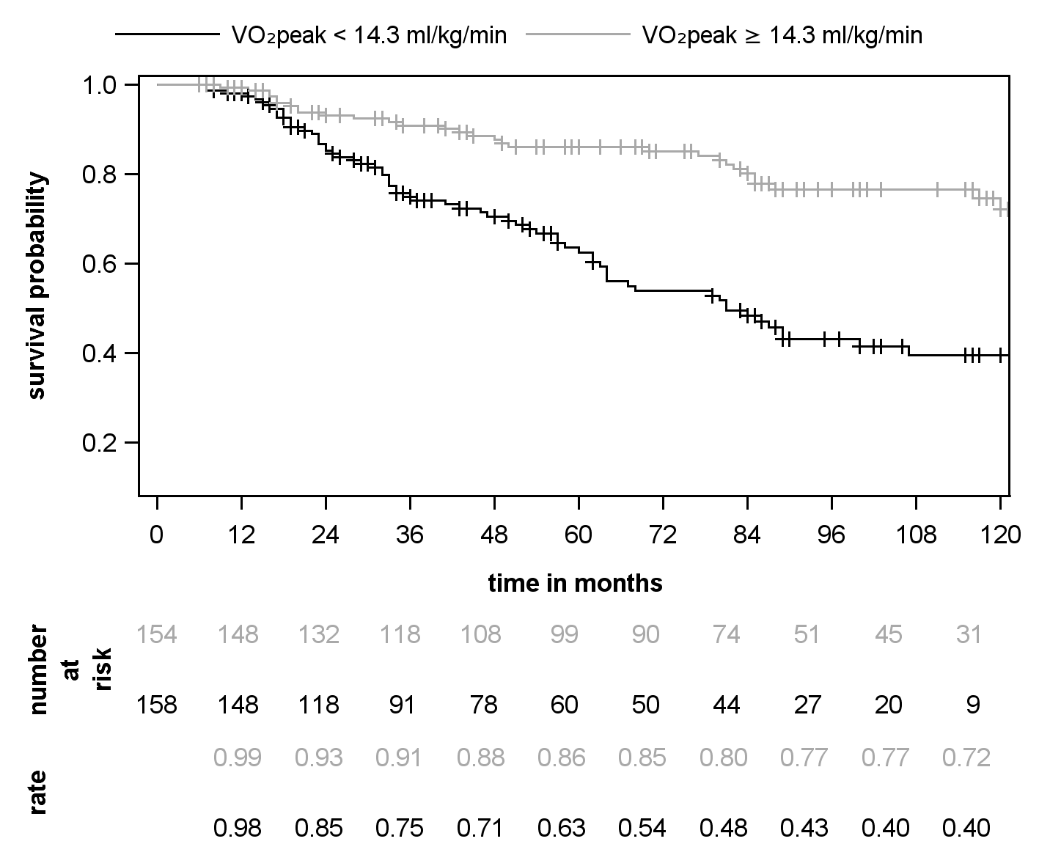


***Figure S2*: VO2peak (mL/kg/min) for discrimination of survival at 1 year**

In receiver operating characteristic analysis (upper panel), VO2peak=14.3 mL/kg/min was identified as the optimal threshold for prediction of survival at 1 year. Survival in patients with VO2peak <14.3 mL/kg/min and ≥14.3 mL/kg/min is shown in a Kaplan–Meier plot (lower panel). AUC=area under the curve (reported with 95% confidence interval). VO2peak=peak oxygen uptake.


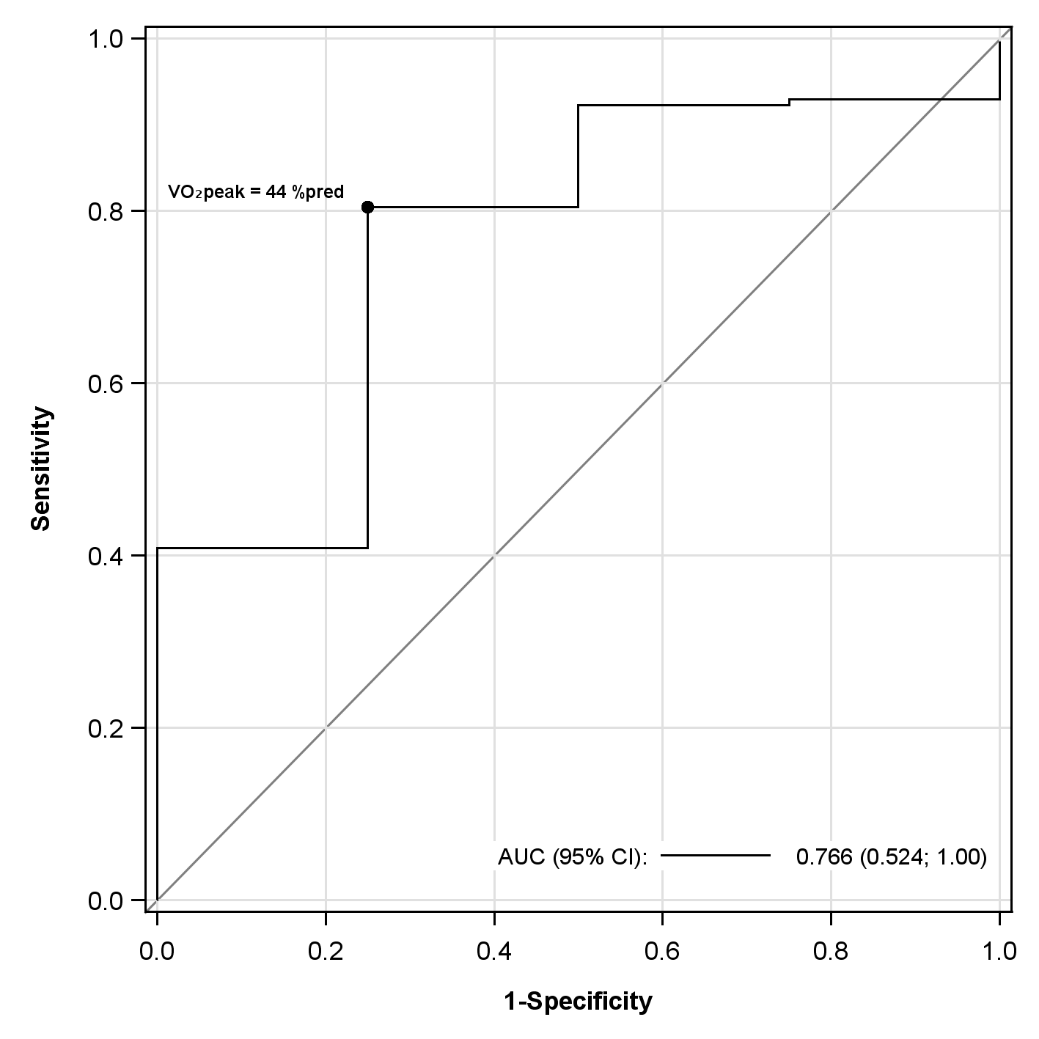


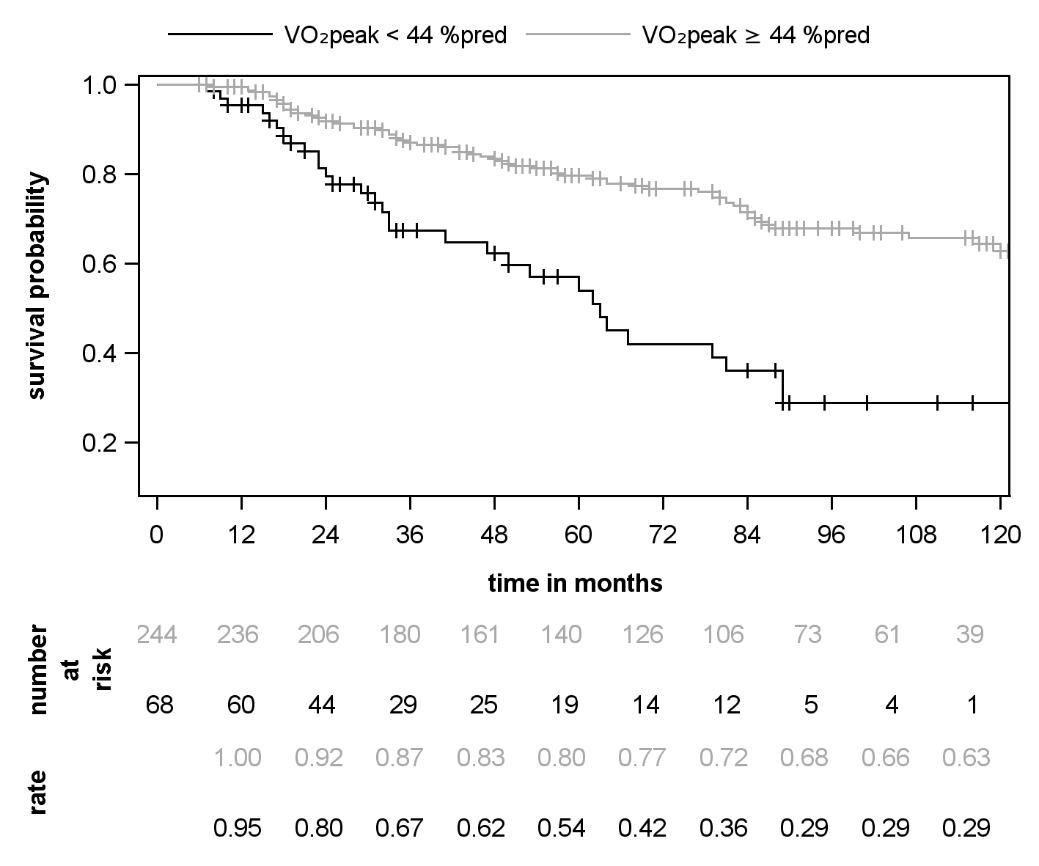


***Figure S3*: VO2peak (% predicted) for discrimination of survival at 1 year**

In receiver operating characteristic analysis (upper panel), VO2peak=44% predicted was identified as the optimal threshold for prediction of survival at 1 year. Survival in patients with VO2peak <44% predicted and ≥44% predicted is shown in a Kaplan–Meier plot (lower panel). AUC=area under the curve (reported with 95% confidence interval). VO2peak=peak oxygen uptake.


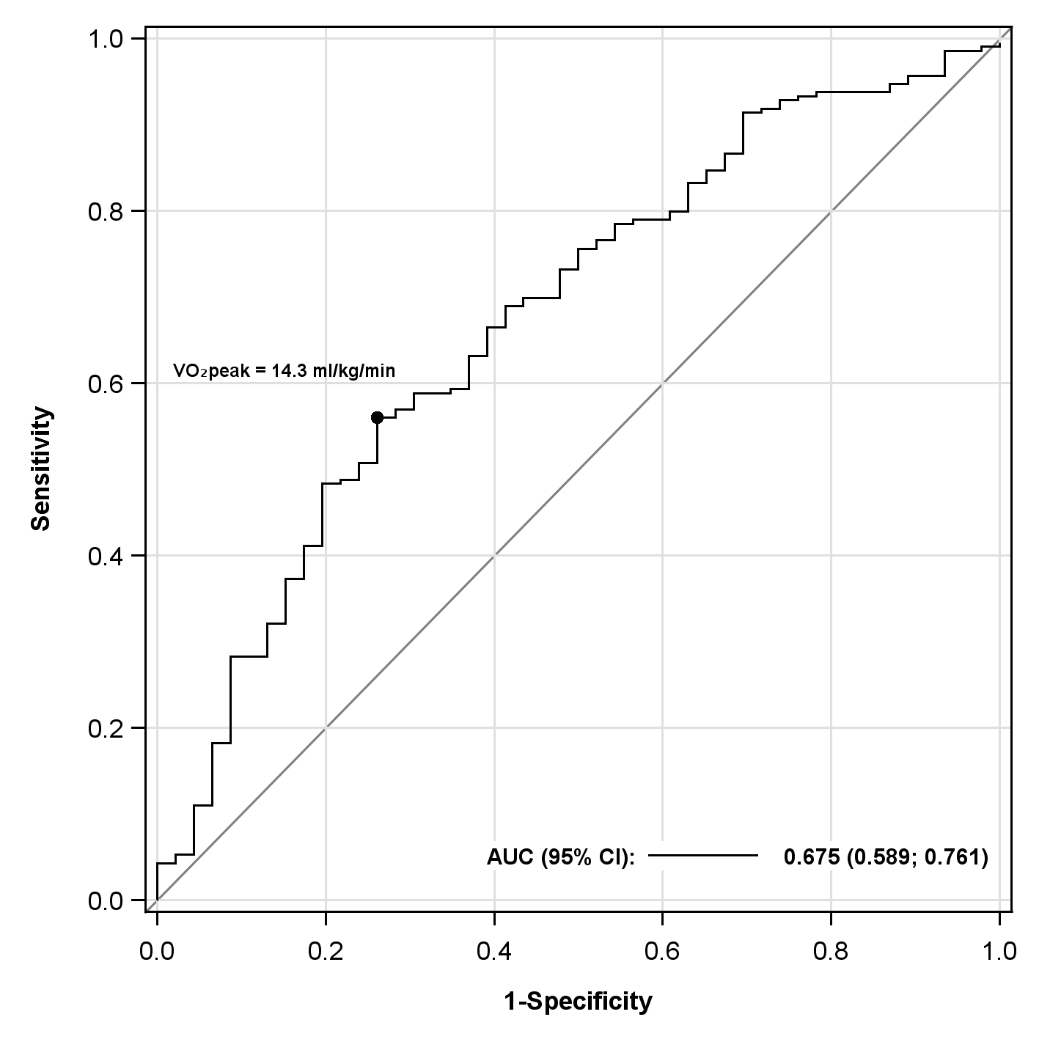


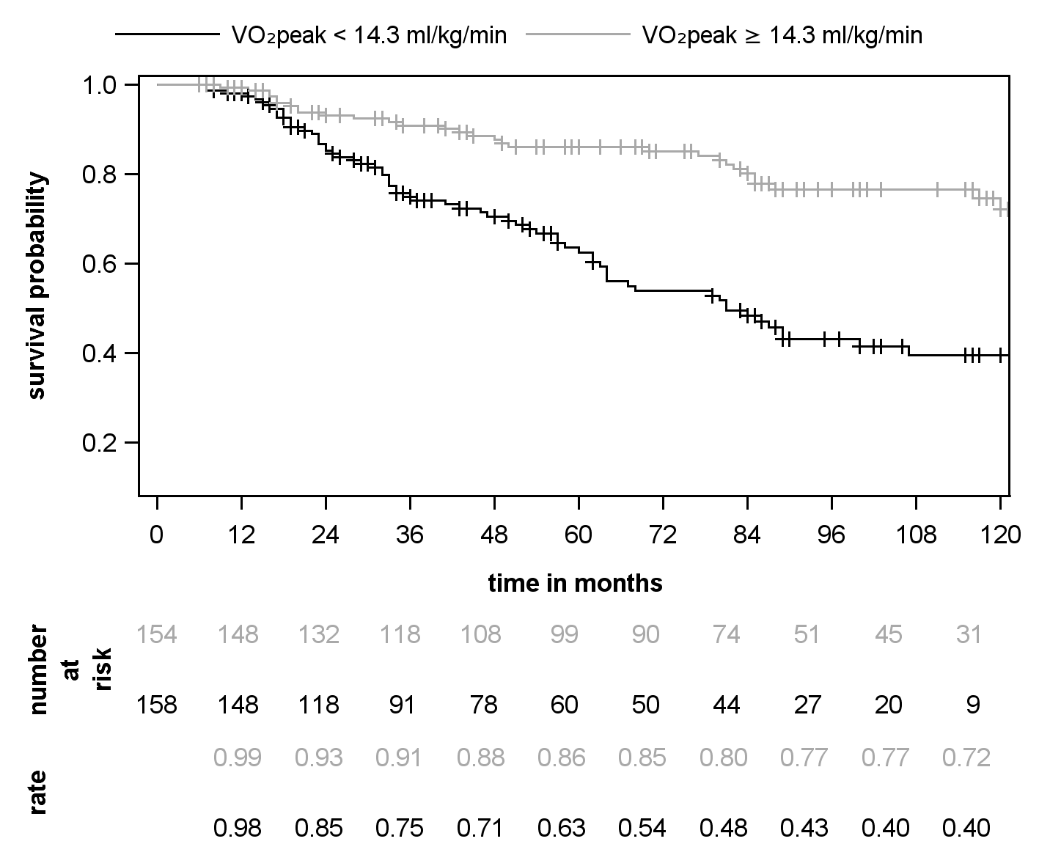


***Figure S4*: VO2peak (mL/kg/min) for discrimination of prognosis at 3 years**

In receiver operating characteristic analysis (upper panel), VO2peak=14.3 mL/kg/min was identified as the optimal threshold for prediction of survival at 3 years. Survival in patients with VO2peak <14.3 mL/kg/min and ≥14.3 mL/kg/min is shown in a Kaplan–Meier plot (lower panel). AUC=area under the curve (reported with 95% confidence interval). VO2peak=peak oxygen uptake.


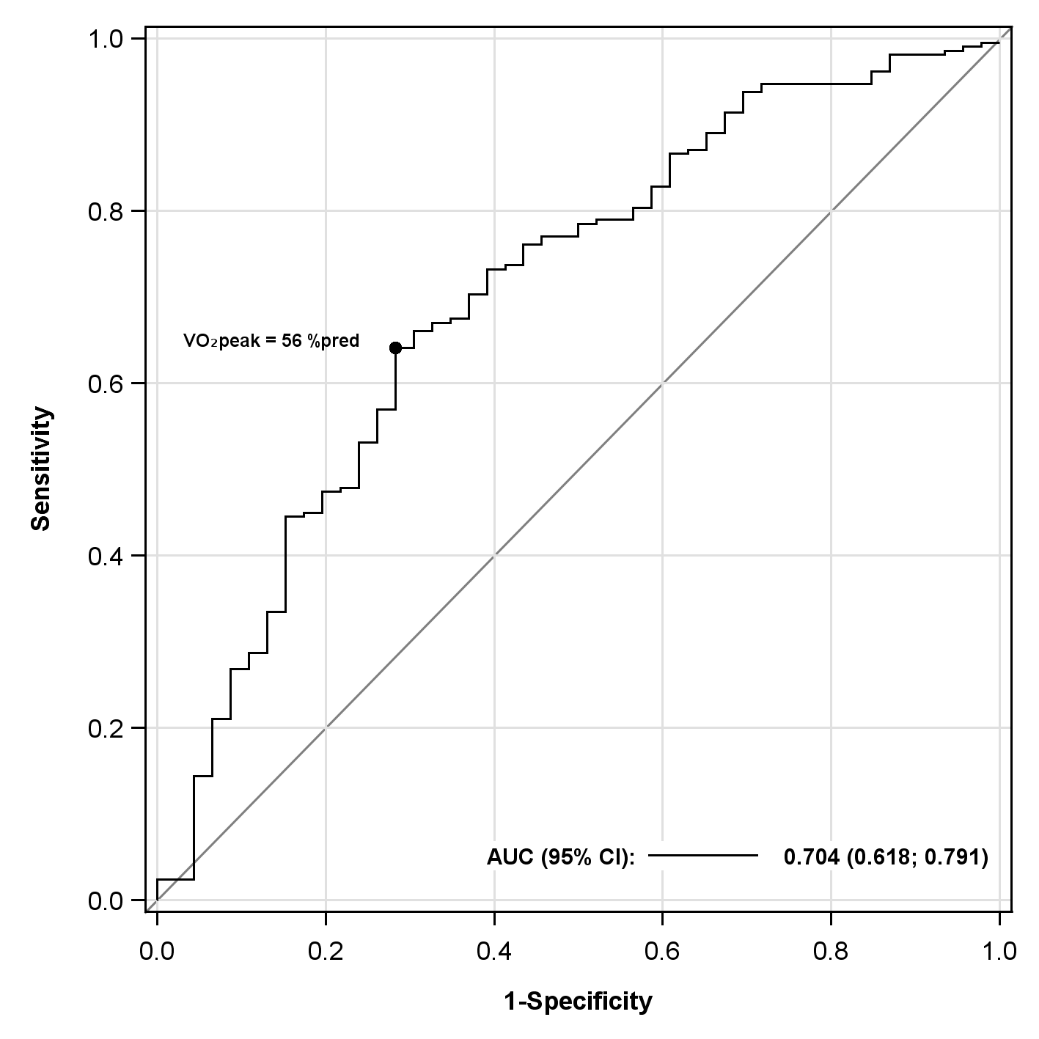

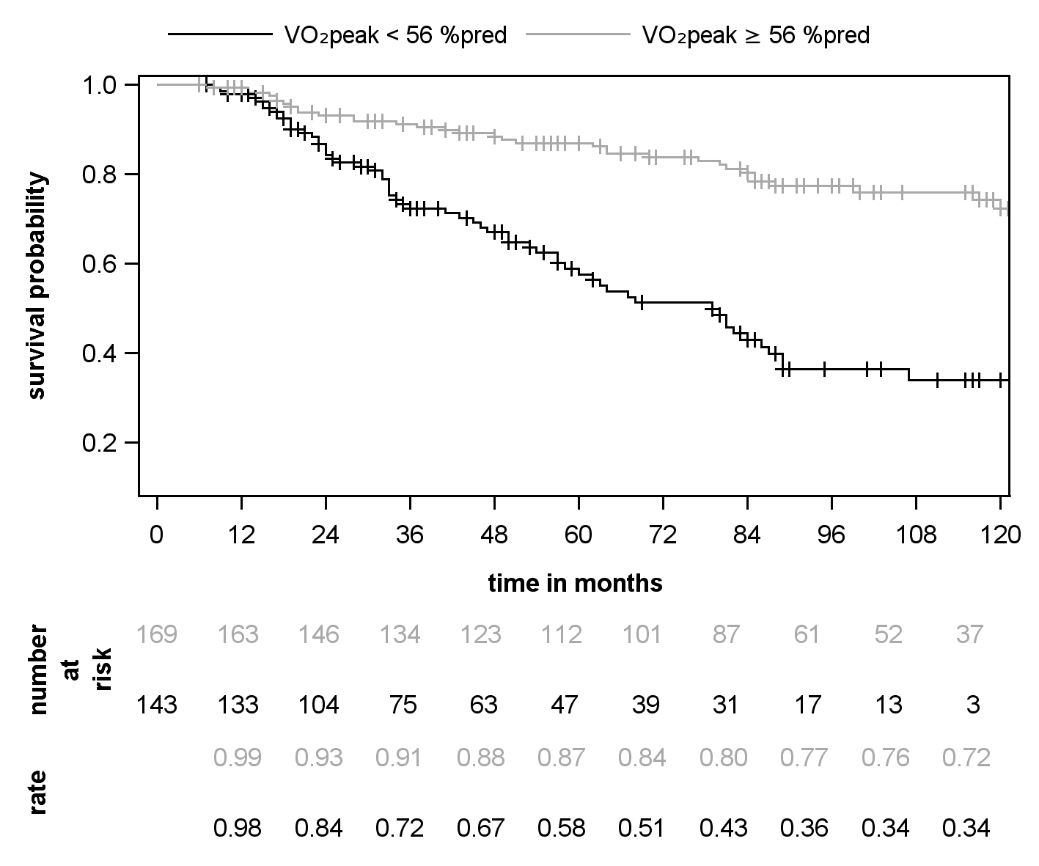


***Figure S5*: VO2peak (% predicted) for discrimination of prognosis at 3 years**

In receiver operating characteristic analysis (upper panel), VO2peak=56% predicted was identified as the optimal threshold for prediction of survival at 3 years. Survival in patients with VO2peak <56% predicted and ≥56% predicted is shown in a Kaplan–Meier plot (lower panel). AUC=area under the curve (reported with 95% confidence interval). VO2peak=peak oxygen uptake.

# Supplementary table

***Table S1*: Calculation of reference values for cardiopulmonary exercise test parameters1**

| **Parameter** | **Calculation** |
| --- | --- |
| Maximum power |  |
| Female | −80·628−0·7698*age[years]+1·4038*height[cm]+0·2873*weight[kg] |
| Male | −103·512−1·5576*age[years]+2·2114*height[cm]−0·1198*weight[kg] |
| VO2peak |  |
| Female | −54·739−9·8085*age[years]−2·9840*height[cm]+4·3668*weight[kg] |
| Male | 29·509−0·5930*age[years]+3·1646* height[cm]+3·9946*weight[kg] |
| VO2@AT |  |
| Female | 298·823−1·5512*age[years]+2·3848*height[cm]+4·7977*weight[kg] |
| Male | 329·082−4·9426*age[years]+4·3686*height[cm]+5·4209*weight[kg] |
| VÉpeak |  |
| Female | −1·896−0·2959*age[years]+0·3516*height[cm]+0·1876*weight[kg] |
| Male | 13·148−0·5809*age[years]+0·4103*height[cm]+0·2887*weight[kg] |
| VO2peak/HRpeak |  |
| Female | −1·720−0·0008*age[years]+0·0512*height[cm]+0·0547*weight[kg] |
| Male | 1·475−0·0613*age[years]+0·0621*height[cm]+0·0724*weight[kg] |

HRpeak=peak heart rate. VÉpeak=peak ventilation. VO2@AT=oxygen uptake at anaerobic threshold. VO2peak=peak oxygen uptake.

# Supplementary reference

1. Glaser S, Ittermann T, Schaper C, et al. [The Study of Health in Pomerania (SHIP) reference values for cardiopulmonary exercise testing]. *Pneumologie* 2013; **67**: 58-63.
